# Supplementary material for: Influence of late Quaternary climate on the biogeography of Neotropical aquatic species as reflected by non-marine ostracodes
Source: Copernicus journal article supplement (doi:10.5194/bg-17-145-2020), 2020-01-16
Supplement: Supplementary file 1 [file bg-17-145-2020-supplement.pdf]

Supplement of Biogeosciences, 17, 145–161, 2020  
<https://doi.org/10.5194/bg-17-145-2020-supplement>  
© Author(s) 2020. This work is distributed under  
the Creative Commons Attribution 4.0 License.

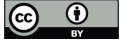

*Supplement of*

## **Influence of late Quaternary climate on the biogeography of Neotropical aquatic species as reflected by non-marine ostracodes**

**Sergio Cohuo et al.**

*Correspondence to:* Sergio Cohuo ([sergiocd@comunidad.unam.mx](mailto:sergiocd@comunidad.unam.mx))

The copyright of individual parts of the supplement might differ from the CC BY 4.0 License.

## Supplementary material

Table S1. Northern Neotropical fossil records for two endemic (*Cypria petenensis*, *Paracythereis opesta*) and two non-endemic (*Cytheridella ilosvayi*, *Darwinula stevensoni*) ostracode species.

|    | Locality                                     | <i>Cypria petenensis</i> | <i>Paracythereis opesta</i> | <i>Cytheridella ilosvayi</i> | <i>Darwinula stevensoni</i> | Time Interval Studied (ka BP) | Reference                     |
|----|----------------------------------------------|--------------------------|-----------------------------|------------------------------|-----------------------------|-------------------------------|-------------------------------|
| 1  | Laguna Petenxil, Guatemala                   |                          | x                           |                              |                             | 4-0                           | Goulden, 1966                 |
| 2  | Laguna de Cocos, Belize                      | x                        |                             | x                            | x                           | 5.93-0                        | Bradbury et al., 1991         |
| 3  | Cobweb Swamp, Belize                         |                          |                             | x                            |                             | 7-0                           | Alcala-Herrera et al., 1994   |
| 4  | Chichancanab, México                         | x?                       |                             |                              |                             | 7.6-0                         | Hodell et al., 1995           |
| 5  | Punta Laguna, México                         |                          |                             | x                            |                             | 3.31-0                        | Curtis et al., 1996           |
| 6  | Laguna Cobá, México                          | x?                       |                             |                              |                             | 7.6-0                         | Whitmore et al., 1996         |
| 7  | Lago Petén Itzá, Guatemala                   |                          |                             | x                            |                             | 9.12-0                        | Curtis et al., 1998           |
| 8  | Wallywash Great Pond, Jamaica                |                          |                             | x                            | x                           | 12.5-0                        | Holmes, 1998                  |
| 9  | Salpetén, Guatemala                          | x                        |                             |                              |                             | 4-0                           | Rosenmeier et al., 2002a      |
| 10 | Salpetén, Lago Petén Itzá, Guatemala         | x                        | x                           | x                            |                             | 8.78-0                        | Rosenmeier et al., 2002b      |
| 11 | Lago Petén Itzá, Guatemala                   |                          | x                           |                              |                             | 11.25-0                       | Hillesheim et al., 2005       |
| 12 | Xcaamal, México                              |                          |                             |                              | x                           | 2.6-0                         | Hodell et al., 2005           |
| 13 | Little Salt Spring, United States of America |                          |                             | x                            | x                           | 12-0                          | Álvarez-Zarikian et al., 2005 |
| 14 | Cenote Aktun ha, México                      |                          |                             | x                            | x                           | 6.94-0                        | Gabriel et al., 2009          |
| 15 | Lago Petén Itzá, Guatemala                   |                          |                             | x                            |                             | 43-0                          | Escobar et al., 2010          |

|    |                               |   |   |   |   |        |                      |
|----|-------------------------------|---|---|---|---|--------|----------------------|
| 16 | Lago Petén Itzá,<br>Guatemala | x | x | x |   | 5.25-0 | Pérez et al., 2010   |
| 17 | Lago Petén Itzá,<br>Guatemala | x | x |   | x | 24-10  | Pérez et al., 2011   |
| 18 | Lago Petén Itzá,<br>Guatemala |   | x |   |   | 43-0   | Escobar et al., 2012 |
| 19 | Laguna Tuspán,<br>Guatemala   |   | x | x | x | 5.3-0  | Fleury et al., 2014  |
| 20 | Lago Petén Itzá,<br>Guatemala | x | x | x | x | 53-14  | Cohuo et al., 2018   |

## References

Alcala-Herrera, J. A., Jacob, J. S., Machain Castillo, M. L. and Neck, R. W.: Holocene Palaeosalinity in a Maya Wetland, Belize, Inferred from the Microfaunal Assemblage, *Quat. Res.*, 41, 121-130, <https://doi.org/10.1006/qres.1994.1013>, 1994.

Álvarez Zariqian, C. A., Swart, P. K., Gifford, J. A. and Blackwelder, P. L.: 2005. Holocene paleohydrology of Little Salt Spring, Florida, based on ostracod assemblages and stable isotopes, *Palaeogeogr. Palaeoclimatol. Palaeoecol.*, 225, 134-156, <https://doi.org/10.1016/j.palaeo.2004.01.023>, 2005.

Bradbury, J. P., Forester, R. M., Bryant, W. and Covich, A. P.: Paleolimnology of Laguna de Cocos, Albion Island, Rio Hondo, Belize, in *Ancient Maya Wetland Agriculture, Excavations on Albion Island, Northern Belize*, edited by: DeLand M., Boulder, Colorado, Westview Press. 119-154. <https://doi.org/10.1002/gea.3340060307>, 1991.

Cohuo, S., Macario-González, L., Pérez, L., Sylvestre, F., Paillès, C., Curtis, J., Kutterolf, S., Wojewódka, M., Zawisza, E., Szeroczyńska, K. and Schwalb, A.: Ultrastructure and aquatic community response to Heinrich Stadial (HS5a-HS1) in the continental northern Neotropics, *Quat. Sci. Rev.*, 197, 75- 91, <https://doi.org/10.1016/j.quascirev.2018.07.015>, 2018.

Curtis, J., Hodell, D., and Brenner, M.: Climate variability on the Yucatan Peninsula (Mexico) during the Past 3500 years, and implications for Maya cultural evolution, *Quat. Res.*, 46, 37-47, <https://doi.org/10.1006/qres.1996.0042>, 1996.

Curtis, J., Brenner, M., Hodell, D., Balsler, R., Islebe, G. and Hooghiemstra, H.: A multi proxy study of Holocene environmental change in the maya lowlands of Peten, Guatemala, *J. Paleolimnol.*, 19, 139-159, <https://doi.org/10.1023/A:1007968508262>, 1998.

Escobar, J., Curtis, J., Brenner, M., Hodell, D.A. and Holmes, J.: Isotope measurement of ostracod and gastropod shells for climate reconstruction: evaluation of within-sample variability and determination of optimum sample size, *J. Paleolimnol.*, 43, 921- 938, <https://doi.org/10.1007/s10933-009-9377-9>, 2010.

Escobar, J., Hodell, D. A., Brenner, M., Curtis, J. H., Gilli, A., Mueller, A. D., Anselmetti, F. S., Ariztegui, D., Grzesik, D. A., Pérez, L., Schwalb, A. and Guilderson, T. P.: A ~43ka record of paleoenvironmental change in the Central American lowlands inferred from stable isotopes of lacustrine ostracods, *Quat. Sci. Rev.*, 37, 92–104, <https://doi.org/10.1016/j.quascirev.2012.01.020>, 2012.

Fleury, S., Malaizé, B., Giraudeau, J., Galop, D., Bout-Roumazeilles, V., Martinez, P., Charlier, K., Carbonel, P., Arnaud, M.: Impacts of Mayan land use on Laguna Tuspán watershed (Petén, Guatemala) as seen through clay and ostracode analysis, *J. Archaeol. Sci.*, 49, 372-382, <https://doi.org/10.1016/j.jas.2014.12.007>, 2014.

Gabriel, J., Reinhard, E. and Peros, M. C.: Palaeoenvironmental evolution of Cenote Aktun Ha (Carwash) on the Yucatan Peninsula, Mexico and its response to Holocene sea-level rise, *J. Paleolimnol.*, 42, 199–213, <https://doi.org/10.1007/s10933-008-9271-x>, 2009.

Goulden, C. E.: The history of Laguna de Petenxil: The animal microfossils, *Acad. Arts. Sci. Mem.*, 17, 84-120, 1966.

Hillesheim, M., Hodell, D., Leyden, B., Brenner, M., Curtis, J., Anselmetti, F., Ariztegui, D., Buck, D., Guilderson, T., Rosenmeier, M. and Schnurrenberg, D.: Climate change in lowland Central America during the late deglacial and early Holocene, *J. Quat. Sci.*, 20, 363-376, <https://doi.org/10.1002/jqs.924>, 2005.

Hodell, D. A., Curtis, J. H. and Brenner, M.: Possible role of climate in the collapse of Classic Maya civilization, *Nature*, 375, 391-394, <https://doi.org/10.1038/375391a0>, 1995.

Hodell, D., Brenner M. and Curtis, J.: Terminal Classic drought in the northern Maya lowlands inferred from multiple sediment cores in Lake Chichancanab (Mexico), *Quat. Sci. Rev.*, 24, 1413–1427, <https://doi.org/10.1016/j.quascirev.2004.10.013>, 2005.

Holmes, J.: A late Quaternary ostracod record from Wallywash Great Pond, a Jamaican marl lake, *J. Paleolimnol.*, 19, 115-128, <https://doi.org/10.1023/A:1007967122665>, 1998.

Pérez, L., Lorenschat, J., Brenner, M., Scharf, B. and Schwalb, A.: Extant freshwater ostracodes (Crustacea: Ostracoda) from Lago Petén Itzá, Guatemala, *Rev. Biol. Trop.*, 58, 871–895, <https://doi.org/10.15517/rbt.v58i2.5252>, 2010.

Pérez, L., Frenzel, P., Brenner, M., Escobar, J., Hoelzmann, P., Scharf, B. and Schwalb, A.: Late Quaternary (24~10 ka BP) environmental history of the Neotropical lowlands inferred from ostracodes in sediments of Lago Petén Itzá, Guatemala, *J. Paleolimnol.*, 46, 59–74, <https://doi.org/10.1007/s10933-011-9514-0>, 2011.

Rosenmeier, M., Hodell, D., Brenner M. and Curtis, J.: A 4000 year lacustrine record of environmental change in the southern maya lowlands, Petén, Guatemala, *Quat. Res.*, 57, 183-190, <https://doi.org/10.1006/qres.2001.2305>, 2002a.

Rosenmeier, M., Hodell, D., Brenner, M., Curtis, J., Martin, J., Anselmetti, F., Ariztegui, D. and Guilderson, T.: Influence of vegetation change on watershed hydrology: implications for paleoclimatic interpretation of lacustrine d18O records. *J. Paleolimnol.*, 27, 117-131, <https://doi.org/10.1023/A:1013535930777>, 2002b.

Whitmore, T. J., Brenner, M., Curtis, J. H., Dahlin B. H. and Leyden, B.: Holocene climatic and human influences on lakes of the Yucatán Península, Mexico: an interdisciplinary paleolimnological approach, *Holocene*, 6, 273-287, <https://doi.org/10.1177/095968369600600303>, 1996.

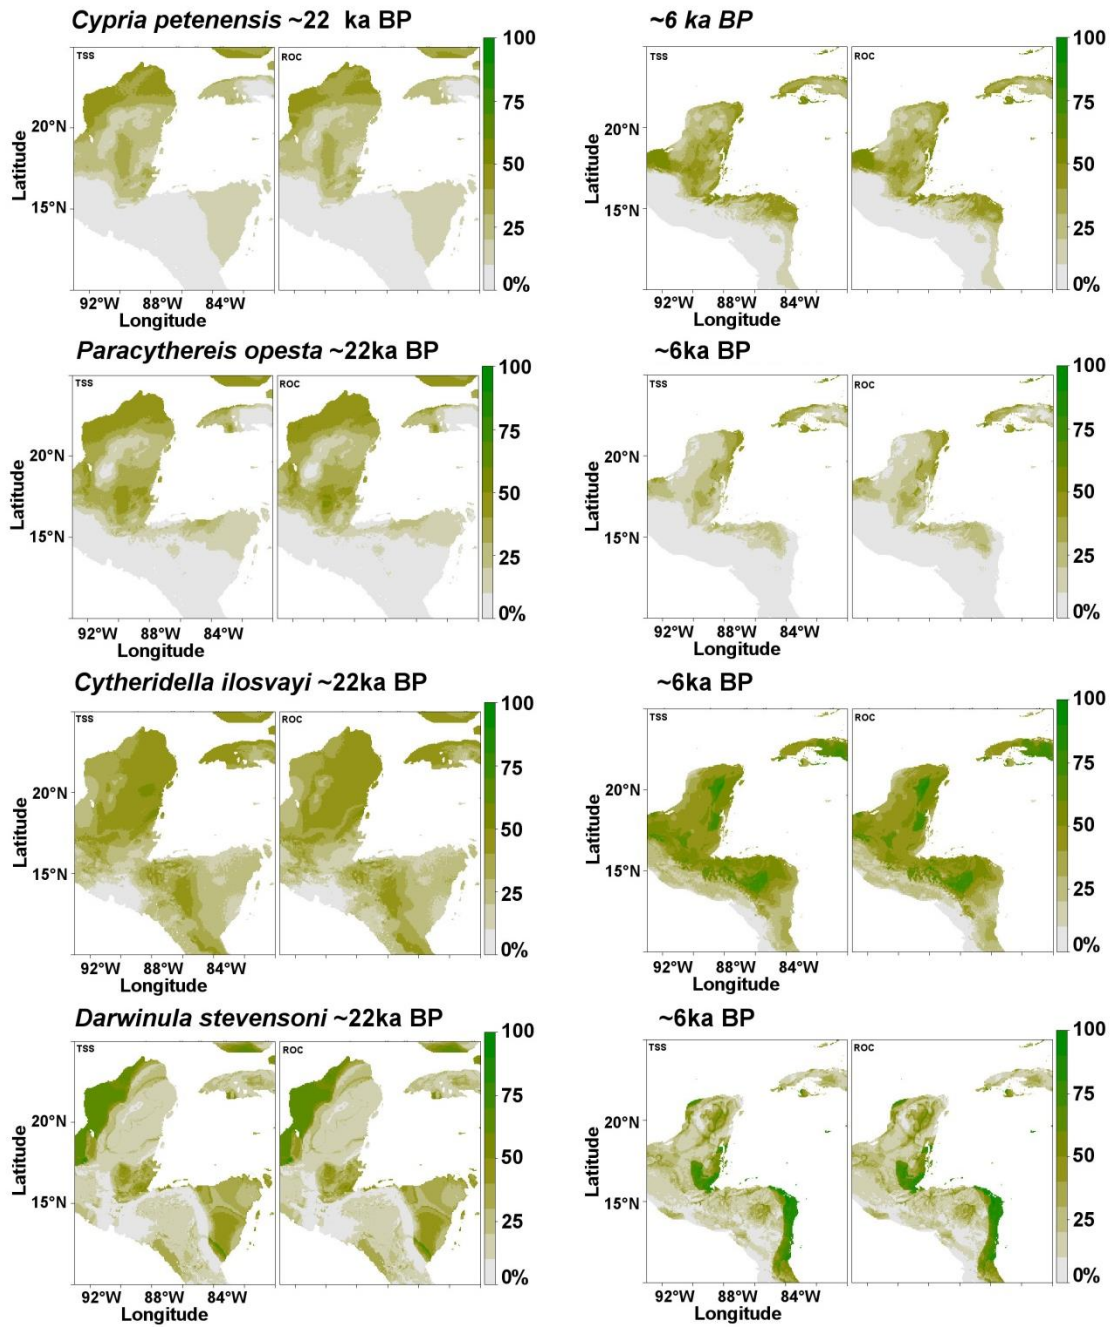

**Figure S1.** Species distribution models of endemic *Cypria petenensis*, *Paracythereis opesta* and non-endemic *Cytheridella ilosvayi*, *Darwinula stevensoni*. Models are based on downscaled and calibrated climatic information of the MIROC-GSM climatic model for the period of ~22 and ~6 ka BP. Models performance were assessed with true skill statistic (TSS) and area under the receiver operating curve (ROC).

Table S2. Pearson correlation analysis of 19 bioclimatic variables of the Northern Neotropical region.

|        | Bio 1       | Bio 2 | Bio 3 | Bio 4        | Bio 5 | Bio 6       | Bio 7 | Bio 8 | Bio 9       | Bio10 | Bio 11 | Bio 12      | Bio 13      | Bio 14      | Bio 15 | Bio 16     | Bio 17 | Bio 18 | Bio 19 |
|--------|-------------|-------|-------|--------------|-------|-------------|-------|-------|-------------|-------|--------|-------------|-------------|-------------|--------|------------|--------|--------|--------|
| Bio 1  | 1           |       |       |              |       |             |       |       |             |       |        |             |             |             |        |            |        |        |        |
| Bio 2  | -0.22       | 1     |       |              |       |             |       |       |             |       |        |             |             |             |        |            |        |        |        |
| Bio 3  | -0.18       | 0.29  | 1     |              |       |             |       |       |             |       |        |             |             |             |        |            |        |        |        |
| Bio 4  | 0.16        | 0.16  | -0.83 | 1            |       |             |       |       |             |       |        |             |             |             |        |            |        |        |        |
| Bio 5  | <b>0.9</b>  | 0.24  | -0.19 | 0.36         | 1     |             |       |       |             |       |        |             |             |             |        |            |        |        |        |
| Bio 6  | <b>0.9</b>  | -0.57 | -0.03 | -0.17        | 0.56  | 1           |       |       |             |       |        |             |             |             |        |            |        |        |        |
| Bio 7  | -0.13       | 0.88  | -0.15 | 0.55         | 0.35  | -0.57       | 1     |       |             |       |        |             |             |             |        |            |        |        |        |
| Bio 8  | <b>0.95</b> | -0.2  | -0.37 | 0.4          | 0.85  | 0.77        | -0.02 | 1     |             |       |        |             |             |             |        |            |        |        |        |
| Bio 9  | <b>0.94</b> | -0.26 | -0.05 | -0.01        | 0.79  | <b>0.9</b>  | -0.23 | 0.83  | 1           |       |        |             |             |             |        |            |        |        |        |
| Bio10  | <b>0.98</b> | -0.16 | -0.1  | 0.66         | 0.56  | 0.62        | -0.42 | 0.57  | 0.62        | 1     |        |             |             |             |        |            |        |        |        |
| Bio 11 | <b>0.95</b> | -0.26 | 0.08  | -0.14        | 0.76  | <b>0.93</b> | -0.3  | 0.82  | <b>0.94</b> | 0.86  | 1      |             |             |             |        |            |        |        |        |
| Bio 12 | 0.05        | -0.42 | 0.36  | -0.53        | -0.21 | 0.33        | -0.59 | -0.07 | 0.18        | -0.06 | 0.21   | 1           |             |             |        |            |        |        |        |
| Bio 13 | 0.04        | -0.25 | 0.47  | -0.6         | -0.15 | 0.28        | -0.48 | -0.11 | 0.16        | -0.08 | 0.23   | <b>0.92</b> | 1           |             |        |            |        |        |        |
| Bio 14 | 0.1         | -0.48 | -0.09 | -0.01        | -0.12 | 0.27        | -0.44 | 0.09  | 0.18        | 0.07  | 0.09   | 0.71        | 0.47        | 1           |        |            |        |        |        |
| Bio 15 | -0.13       | 0.54  | 0.41  | -0.29        | 0.08  | -0.24       | 0.35  | -0.21 | -0.16       | -0.16 | -0.02  | -0.3        | 0.02        | -0.75       | 1      |            |        |        |        |
| Bio 16 | 0.05        | -0.5  | -0.06 | -0.03        | -0.13 | 0.29        | -0.46 | 0.09  | 0.18        | -0.07 | 0.23   | <b>0.94</b> | <b>0.98</b> | 0.51        | -0.03  | 1          |        |        |        |
| Bio 17 | 0.1         | -0.45 | -0.05 | -0.11        | -0.37 | 0.06        | -0.44 | -0.07 | -0.14       | 0.07  | 0.1    | 0.73        | 0.49        | <b>0.98</b> | -0.76  | 0.52       | 1      |        |        |
| Bio 18 | -0.12       | -0.45 | 0.82  | -0.07        | -0.11 | 0.09        | -0.21 | -0.1  | 0.09        | -0.16 | -0.1   | 0.66        | 0.56        | 0.62        | -0.42  | 0.57       | 0.62   | 1      |        |
| Bio 19 | 0.22        | -0.47 | 0.26  | <b>-0.89</b> | -0.04 | 0.48        | -0.59 | 0.08  | 0.36        | 0.12  | 0.34   | 0.79        | -0.05       | -0.01       | 0.79   | <b>0.9</b> | -0.23  | 0.83   | 1      |

Numbers in bold represent variables with strongest correlation. Codes are as follows: Annual Mean Temperature (Bio1), Mean Diurnal Range (Bio2), Isothermality (Bio 3), Temperature Seasonality (Bio 4), Max Temperature of Warmest Month (Bio 5), Min Temperature of Coldest Month (Bio 6), Temperature Annual Range (Bio 7), Mean Temperature of Wettest Quarter (Bio 8), Mean Temperature of Driest Quarter (Bio 9), Mean Temperature of Warmest Quarter (Bio 10), Mean Temperature of Coldest Quarter (Bio 11), Annual Precipitation (Bio 12), Precipitation of



Wettest Month (Bio 13), Precipitation of Driest Month (Bio 14), Precipitation Seasonality (Bio 15), Precipitation of Wettest Quarter (Bio 16), Precipitation of Driest Quarter (Bio 17), Precipitation of Warmest Quarter (Bio 18), Precipitation of Coldest Quarter (Bio 19).
